# Supplementary material for: Mortality risk for kidney transplant candidates with diabetes: a population cohort study
Source: Springer Nature journal article supplement (doi:10.1007/s00125-024-06245-x), 2024-08-05
Supplement: MOESM1 [file 125_2024_6245_MOESM1_ESM.pdf]

Supplementary Figure 1. Kidney replacement therapy counts for kidney failure people with versus without diabetes (Tx = transplantation, No Tx = dialysis)

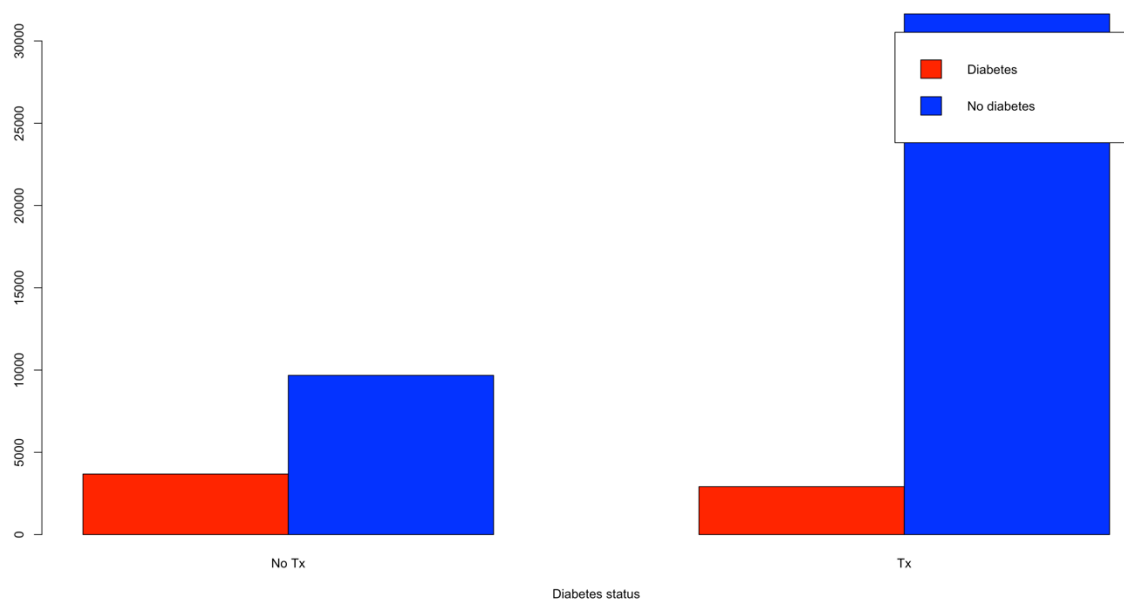

Supplementary Figure 2. Kidney replacement therapy counts for kidney failure people with versus without diabetes (SCD = transplantation with standard criteria donor kidney, LD = transplantation with living donor kidney, ECD = transplantation with expanded criteria donor kidney)

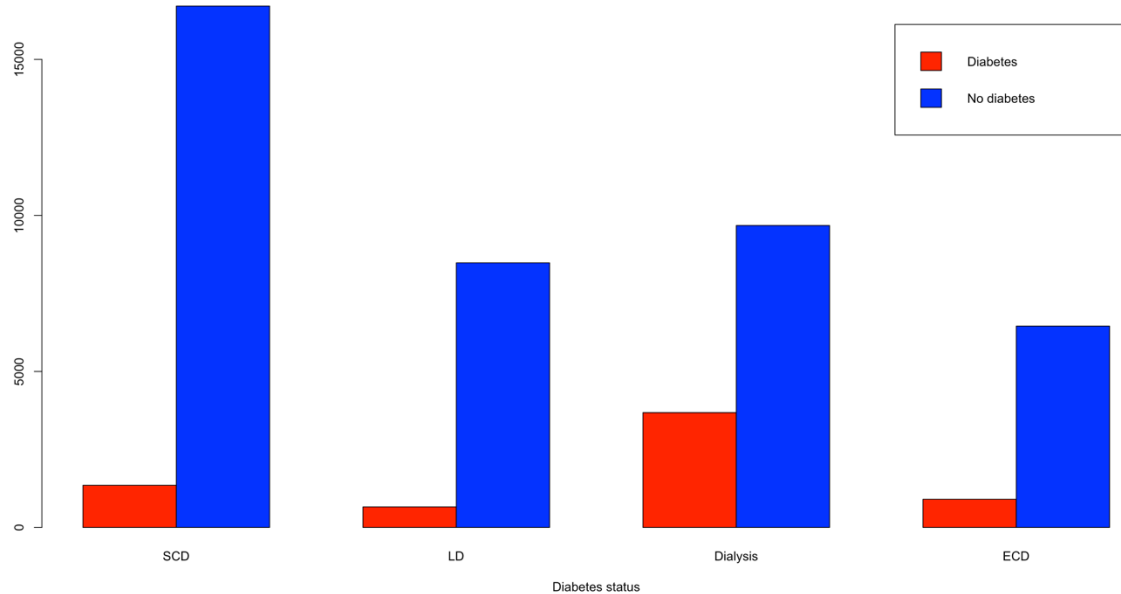

Supplementary Table 1. Baseline demographic comparison of kidney failure people wait-listed on the kidney transplant list stratified by diabetes status

| Characteristic                     |            | Diabetes      | No diabetes    |
|------------------------------------|------------|---------------|----------------|
| N (%)                              |            | 6,594 (13·8%) | 41,323 (86·2%) |
| Transplant list status             | Transplant | 2,913 (44·2%) | 31,645 (76·6%) |
|                                    | Dialysis   | 3,681 (55·8%) | 9,678 (23·4%)  |
| Sex                                | Female     | 2,253 (34·2%) | 15,865 (38·4%) |
|                                    | Male       | 4,341 (65·8%) | 25,458 (61·6%) |
| Age at listing (years, SD)         |            | 50·5, 12·0    | 47·5, 14·3     |
| Ethnic Group                       | White      | 4,559 (69·1%) | 31,680 (76·7%) |
|                                    | Asian      | 1,274 (19·3%) | 5,014 (12·1%)  |
|                                    | Black      | 492 (7·5%)    | 3,079 (7·5%)   |
|                                    | Other      | 219 (3·3%)    | 1,164 (2·8%)   |
|                                    | Unknown    | 50 (0·8%)     | 386 (0·9%)     |
| Time on transplant list (days, SD) |            | 771, 622      | 916, 841       |

SD – standard deviation

**Supplementary Table 2. Baseline demographic and immunological comparison of kidney transplant recipients stratified by diabetes status**

| Characteristic                       |         | Diabetes      | No diabetes    |
|--------------------------------------|---------|---------------|----------------|
| N (%)                                |         | 2,913 (8.4%)  | 31,645 (91.6%) |
| Sex                                  | Female  | 901 (30.9%)   | 12,001 (37.9%) |
|                                      | Male    | 2,012 (69.1%) | 19,644 (62.1%) |
| Age at listing (years, SD)           |         | 52.5, 11.2    | 45.8, 14.0     |
| Age at transplant (years, SD)        |         | 54.4, 11.3    | 48.1, 14.1     |
| Ethnic Group                         | White   | 1,919 (65.9%) | 24,756 (78.2%) |
|                                      | Asian   | 642 (22.0%)   | 3,574 (11.3%)  |
|                                      | Black   | 223 (7.7%)    | 2,150 (6.8%)   |
|                                      | Other   | 111 (3.8%)    | 856 (2.7%)     |
|                                      | Unknown | 18 (0.6%)     | 309 (1.0%)     |
| Time on transplant list (days, SD)   |         | 724, 630      | 862, 843       |
| HLA group                            | Level 1 | 319 (11.0%)   | 3,813 (12.1%)  |
|                                      | Level 2 | 739 (25.4%)   | 9,828 (31.1%)  |
|                                      | Level 3 | 1,428 (49.0%) | 14,016 (44.3%) |
|                                      | Level 4 | 427 (14.7%)   | 3,984 (12.6%)  |
| Cold ischaemic time (hours, SD)      |         | 13.1, 7.2     | 12.9, 7.8      |
| Calculated reaction frequency (mean) |         | 13%           | 19%            |

SD – standard deviation

**Supplementary Table 3. Cox regression model of predictors for graft loss after kidney  
transplantation**

| Variable                                 |              | Hazard Ratio (95% CI) |
|------------------------------------------|--------------|-----------------------|
| Cause of kidney failure                  | Other causes | REF                   |
|                                          | Diabetes     | 1.36 (1.20-1.53)      |
| Median Age at waitlisting in years (IQR) |              | 1.00 (0.99-1.00)      |
| Sex                                      | Female       | REF                   |
|                                          | Male         | 1.08 (0.94-1.24)      |
| Ethnicity                                | White        | REF                   |
|                                          | Asian        | 1.66 (0.99-2.78)      |
|                                          | Black        | 1.78 (1.49-2.12)      |
|                                          | Other        | 1.29 (1.01-1.65)      |
|                                          | Unknown      | 0.36 (0.16-0.81)      |
| Waiting time                             |              | 0.99 (0.98-1.00)      |
| HLA mismatch                             | Level 1      | REF                   |
|                                          | Level 2      | 1.14 (0.87-1.48)      |
|                                          | Level 3      | 1.20 (0.94-1.54)      |
|                                          | Level 4      | 1.27 (0.99-1.63)      |
| Cold ischaemic time                      |              | 1.01 (1.00-1.02)      |
| Calculated reaction frequency            |              | 1.00 (1.00-1.00)      |

**Supplementary Table 4. Cox regression model of predictors for mortality for kidney failure patients with diabetes only (fully adjusted model with transplantation handled as a time varying covariate)**

| Variable                                 |            | Hazard Ratio (95% CI) |
|------------------------------------------|------------|-----------------------|
| Treatment                                | Dialysis   | REF                   |
|                                          | Transplant | 0.38 (0.34-0.42)      |
| Median Age at waitlisting in years (IQR) |            | 1.05 (1.04-1.05)      |
| Sex                                      | Female     | REF                   |
|                                          | Male       | 0.94 (0.87-1.02)      |
| Ethnicity                                | White      | REF                   |
|                                          | Asian      | 0.78 (0.71-0.85)      |
|                                          | Black      | 0.68 (0.59-0.80)      |
|                                          | Other      | 0.76 (0.61-0.95)      |
|                                          | Unknown    | 1.65 (0.91-2.99)      |
| Year of listing                          |            | 0.92 (0.91-0.93)      |
